# Supplementary material for: Ni2Mn-layered double oxide electrodes in organic electrolyte based supercapacitors
Source: Royal Society of Chemistry journal article supplement (doi:10.1039/d1ra04681k), 2021-01-01
Supplement: d1ra04681k1.pdf [file d1ra04681k1.pdf]

## Electronic Supporting Information

### Ni<sub>2</sub>Mn-layered double oxide electrodes in organic electrolyte based supercapacitors †

Jindui Hong,<sup>a</sup> Chunping Chen,<sup>a</sup> Ampornphan Siriviriyanun,<sup>b</sup> Dana-Georgiana Crivoi,<sup>a</sup> Philip Holdway,<sup>c</sup> Jean-Charles Buffet<sup>a</sup> and Dermot O'Hare<sup>\*a</sup>

*a. Chemistry Research Laboratory, Department of Chemistry, University of Oxford, 12 Mansfield Road, Oxford, OX1 3TA, UK. E-mail: dermot.ohare@chem.ox.ac.uk; Tel: +44 (0)1865 272686*

*b. SCG Chemicals Co Ltd, 1 Siam Cement Rd, Bangsue, Bangkok, 10800, Thailand*

*c. Department of Materials, University of Oxford, Parks Road, Oxford, OX1 3PH, United Kingdom*

#### Table of Contents

|                                                                                                                                                                                                                                                                                                                                                                                                                                                                                                                                                                             |   |
|-----------------------------------------------------------------------------------------------------------------------------------------------------------------------------------------------------------------------------------------------------------------------------------------------------------------------------------------------------------------------------------------------------------------------------------------------------------------------------------------------------------------------------------------------------------------------------|---|
| <b>Chemicals and Materials</b> .....                                                                                                                                                                                                                                                                                                                                                                                                                                                                                                                                        | 1 |
| <b>Materials characterisation</b> .....                                                                                                                                                                                                                                                                                                                                                                                                                                                                                                                                     | 2 |
| <b>Fig. S1.</b> XPS spectra of Ni 2p <sub>3/2</sub> for (a) LDO200, (b) LDO300, (c) LDO700, (d) LDO900, XPS spectra of Mn 2p <sub>2/3</sub> for (e) LDO200, (f) LDO300, (g) LDO700 and (h) LDO900 indicated that there are Ni <sup>2+</sup> and mixing of Mn <sup>2+</sup> /Mn <sup>3+</sup> /Mn <sup>4+</sup> in LDO300, LDO700 and LDO900 while mixing of Ni <sup>2</sup> /Ni <sup>3+</sup> and mixing of Mn <sup>3+</sup> /Mn <sup>4+</sup> /Mn <sup>5+</sup> for LDO200. ....                                                                                           | 4 |
| <b>Fig. S2.</b> (a) N <sub>2</sub> adsorption isotherms of LDH and LDOs and (b) BJH pore size distribution of LDH and LDOs.....                                                                                                                                                                                                                                                                                                                                                                                                                                             | 5 |
| <b>Fig. S3.</b> CV curves of (a) LDO200, (b) LDO300, (c) LDO500, (d) LDO600, (e) LDO700 and (f) LDO900 at the scan rate of 50 mV S <sup>-1</sup> . Electrolyte: 1 M tetraethylammonium tetrafluoroborate (TEABF <sub>4</sub> ) in acetonitrile.....                                                                                                                                                                                                                                                                                                                         | 6 |
| <b>Fig. S4.</b> (a) The effect of calcination ramping rate (calcination temperature and holding time fixed at 400 °C and 3 h, respectively) and (b) the effect of calcination holding time rate (calcination temperature and ramping rate fixed at 400 °C and 5 °C min <sup>-1</sup> , respectively) on the specific capacitance of LDO400 showing that generally, lower ramping rate, higher specific capacitance and the effect of calcination hold time is negligible. Electrolyte: 1 M tetraethylammonium tetrafluoroborate (TEABF <sub>4</sub> ) in acetonitrile. .... | 7 |

## Chemicals and Materials

Carbon black, (Super P® Conductive, 99+% metals basis, Alfa Aesar), Polyvinylidene fluoride (average molecular weight  $\sim 534,000$  g mol<sup>-1</sup>, powder, PVDF, Sigma-Aldrich), 1-Methyl-2-pyrrolidinone (NMP, Sigma-Aldrich), activated charcoal (AC, Sigma-Aldrich), tetraethylammonium tetrafluoroborate (TEABF<sub>4</sub>, 99%, Sigma-Aldrich), acetonitrile (AN, anhydrous, 99.8%, Sigma-Aldrich), manganese(II) nitrate tetrahydrate (Mn(NO<sub>3</sub>)<sub>2</sub>·4H<sub>2</sub>O, >97%, Honeywell), nickel(II) nitrate hexahydrate (Ni(NO<sub>3</sub>)<sub>2</sub>·6H<sub>2</sub>O, >98.5%, Sigma-Aldrich), sodium carbonate (Na<sub>2</sub>CO<sub>3</sub>, 99.6%, Acros Organics), nickel(II) hydroxide (Ni(OH)<sub>2</sub>, Sigma-Aldrich), manganese dioxide (MnO<sub>2</sub>, activated,  $\sim 85\%$ ,  $<10$   $\mu\text{m}$ , Sigma-Aldrich), nitric acid (70%, Fisher), sodium hydroxide (NaOH, Sigma-Aldrich) were received and used without further treatment. Nickel foam (purity  $> 99.99\%$ , porosity  $\geq 95\%$ , thickness: 1.6 mm, MTI Corporation) were received, cut into 3 cm x 1 cm stripes and sonicated in hydrochloric acid ( $\sim 37\%$ , Fisher) for 5 minutes, followed sonication in deionised water for 5 minutes, sonication in acetone for another 5 minutes to remove surface nickel oxide layer, before drying overnight in an oven at 60 °C.

## Materials characterisation

Powder X-ray diffraction (XRD) was conducted on a diffractometer (PAN-Analytical X'Pert Pro) at 40 kV and 40 mA using Cu K radiation ( $\alpha_1 = 1.54057$  Å,  $\alpha_2 = 1.54433$  Å, weighted average = 1.54178 Å) from 5 to 70°. The chemical state and chemical compositions of LDH and LDOs were studied using a Thermo Scientific K-Alpha X-ray Photoelectron Spectrometer (XPS) System, with an ion pumped VG Microtech CLAM 4 MCD analyser system equipped with a 200 W unmonochromated Mg K $\alpha$  X-ray radiation of 1253.6 eV, with detection limits of  $\sim 0.2$  atomic %. Thermogravimetric analyses of LDH were carried out using a TGA/DSC1 STAR<sup>e</sup> system (METTLER TOLEDO) from 30-900 °C at a ramp rate of 10 °C min<sup>-1</sup> in constant air flow (50 mL min<sup>-1</sup>). Differential thermogravimetric analysis (DTG) was obtained from the 1<sup>st</sup> derivative of TGA data. Morphology and elemental distribution of LDH and LDOs were observed using a Transmission Electron Microscopy (TEM, JEOL-2100, operated at 200 kV) with an energy-dispersive X-ray Inca spectrometer (EDS, Oxford Instruments). Nitrogen sorption analysis was performed using a porosity analyser (Micrometric TriStar) at -196 °C.

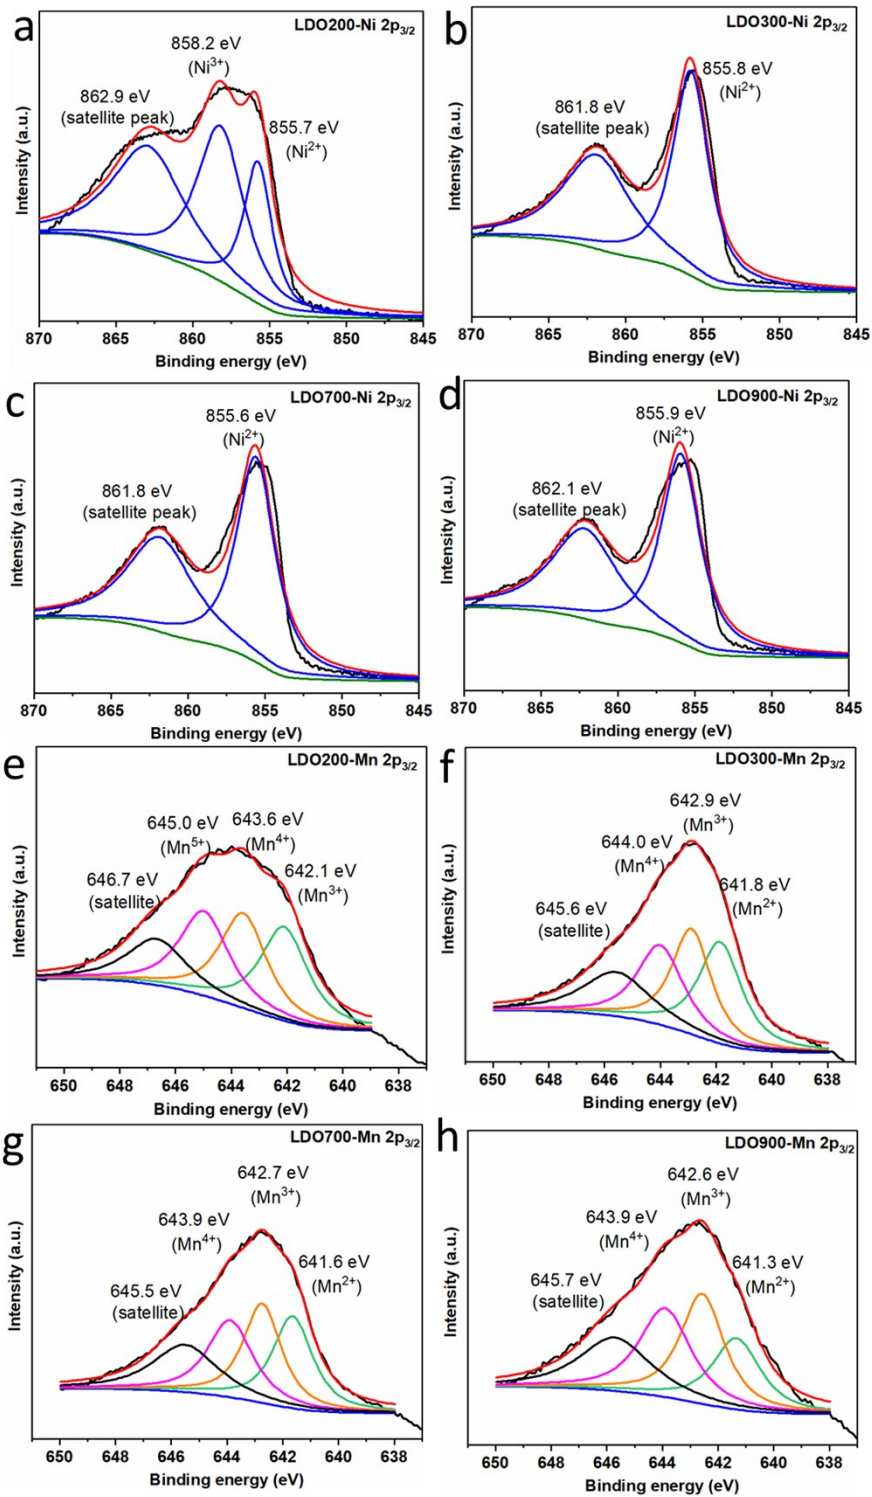

**Fig. S1.** XPS spectra of Ni 2p<sub>3/2</sub> for (a) LDO200, (b) LDO300, (c) LDO700, (d) LDO900, XPS spectra of Mn 2p<sub>2/3</sub> for (e) LDO200, (f) LDO300, (g) LDO700 and (h) LDO900 indicated that there are Ni<sup>2+</sup> and mixing of Mn<sup>2+</sup>/Mn<sup>3+</sup>/Mn<sup>4+</sup> in LDO300, LDO700 and LDO900 while mixing of Ni<sup>2+</sup>/Ni<sup>3+</sup> and mixing of Mn<sup>3+</sup>/Mn<sup>4+</sup>/Mn<sup>5+</sup> for LDO200.

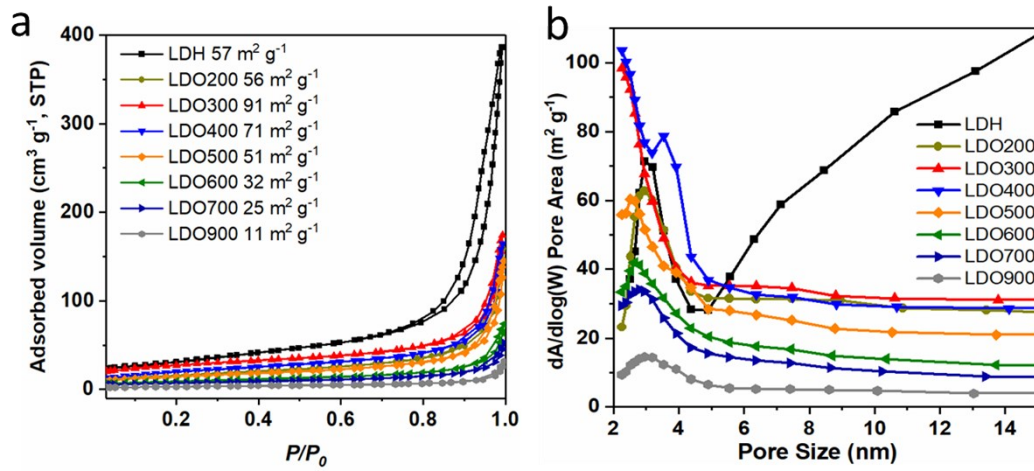

**Fig. S2.** (a)  $N_2$  adsorption isotherms of LDH and LDOs and (b) BJH pore size distribution of LDH and LDOs.

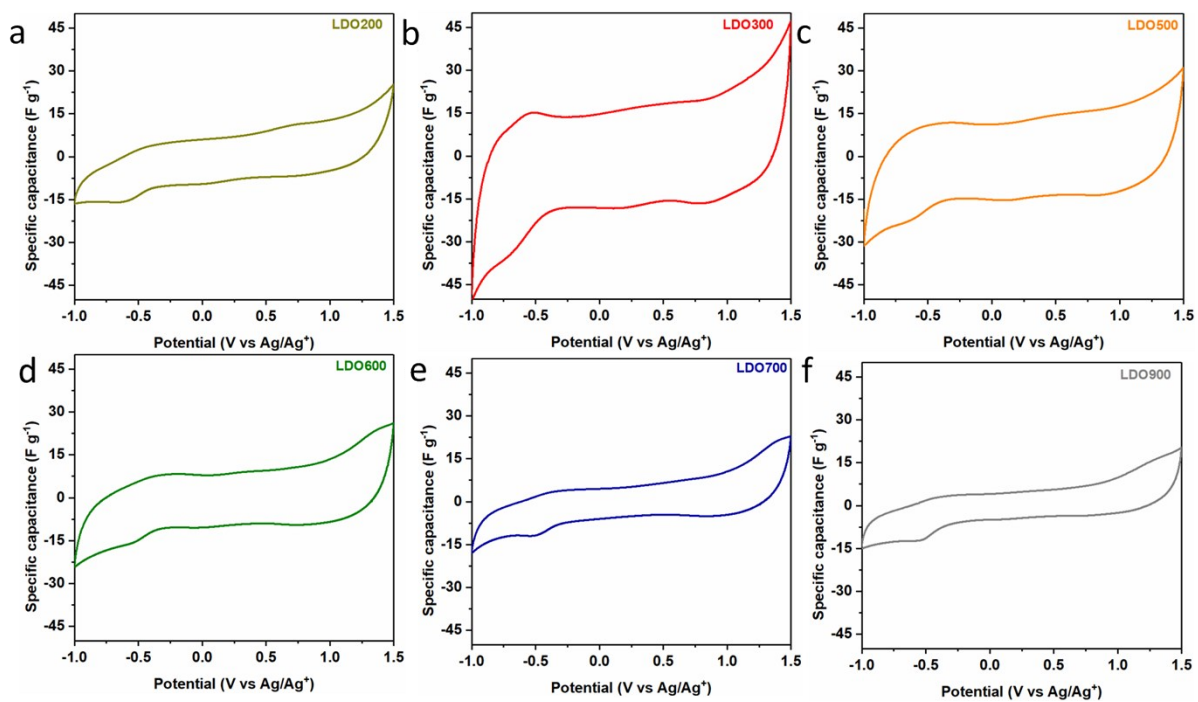

**Fig. S3.** CV curves of (a) LDO200, (b) LDO300, (c) LDO500, (d) LDO600, (e) LDO700 and (f) LDO900 at the scan rate of  $50 \text{ mV S}^{-1}$ . Electrolyte: 1 M tetraethylammonium tetrafluoroborate ( $\text{TEABF}_4$ ) in acetonitrile.

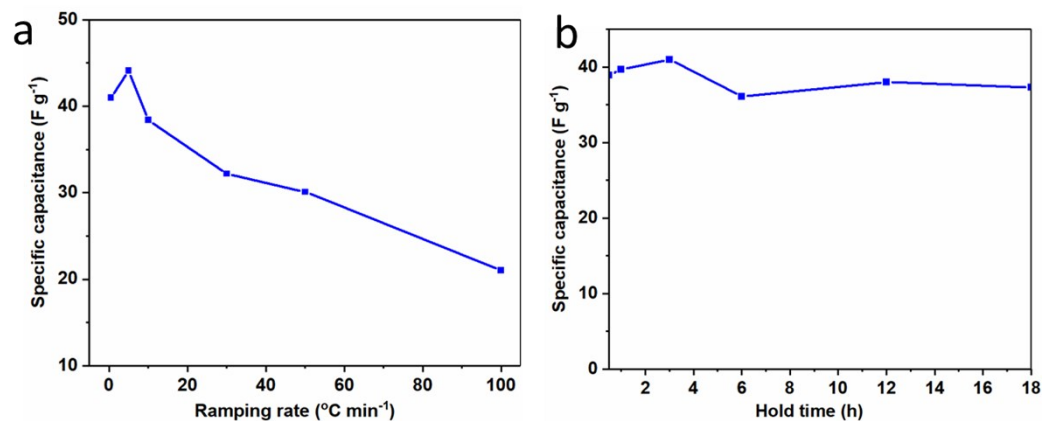

**Fig. S4.** (a) The effect of calcination ramping rate (calcination temperature and holding time fixed at 400 °C and 3 h, respectively) and (b) the effect of calcination holding time rate (calcination temperature and ramping rate fixed at 400 °C and 5 °C min<sup>-1</sup>, respectively) on the specific capacitance of LDO400 showing that generally, lower ramping rate, higher specific capacitance and the effect of calcination hold time is negligible. Electrolyte: 1 M tetraethylammonium tetrafluoroborate (TEABF<sub>4</sub>) in acetonitrile.
